# Supplementary material for: Beyond Neuronal Microtubule Stabilization: MAP6 and CRMPS, Two Converging Stories
Source: PubMed Central journal article supplement (PMC8131560; doi:10.3389/fnmol.2021.665693), 2021-05-05
Supplement: Table_1.pdf [file Table_1.pdf]

**Supplementary Table 1: MAP6 partners**

| Category            | Partner              | Human gene     | Name and aliases                             | Localizations and Roles                                                                                                                  | MAP6 partners found in the experiment     | Identification methods        | Ref    | Confidence |
|---------------------|----------------------|----------------|----------------------------------------------|------------------------------------------------------------------------------------------------------------------------------------------|-------------------------------------------|-------------------------------|--------|------------|
| <b>Cytoskeleton</b> | <b>Microtubules</b>  | Multiple genes | $\alpha$ -Tubulin / $\beta$ -Tubulin         | -Ubiquitous, cell body, dendrites, axon<br>-Vesicular transport, neuronal polarization, synaptic plasticity                              |                                           | -Co-pelleting<br>-IF<br>-NMR  | (1-3)  | Strong     |
|                     | <b>Actin</b>         | Multiple genes | F-Actin                                      | -Ubiquitous, cell body, dendrites, axon<br>-Cell motility, structure and plasticity                                                      |                                           | -Co-pelleting<br>-IF<br>-FRET | (4, 5) | Strong     |
|                     | <b>Neurofilament</b> | Multiple genes | Neurofilament light, medium and heavy chains | -Neuronal, enriched in axons<br>-Neuronal caliber, intracellular transport<br>-Form spheroid aggregates in Amyotrophic Lateral Sclerosis |                                           | -Co-purification              | (6)    | Moderate   |
|                     | <b>Inversin</b>      | INVS           | Inversin/<br>NPHP2 / INV / NPH2              | -Ubiquitous, basal body of the cilia<br>-Wnt signaling pathway<br>-Nephronophthisis (ciliopathy)                                         | Tubulin<br>Actin<br>14-3-3 $\zeta/\delta$ | -Peptide-affinity column      | (9)    | Moderate   |
|                     | <b>Bmcc1s</b>        | PRUNE2         | Prune homolog 2<br>BMCC1 / BNIPXL / Prune2   | -Enriched in the brain<br>-Bmcc1s variant bound to microtubules<br>-Proapoptotic<br>-Potential biomarker of AD                           | Tubulin                                   | -GST pull down<br>-Co-IP      | (10)   | Strong     |

|                     |                    |         |                                                                                          |                                                                                                                                                                                                                                                          |                                                                                                                                                                |                           |      |          |
|---------------------|--------------------|---------|------------------------------------------------------------------------------------------|----------------------------------------------------------------------------------------------------------------------------------------------------------------------------------------------------------------------------------------------------------|----------------------------------------------------------------------------------------------------------------------------------------------------------------|---------------------------|------|----------|
| <b>Cytoskeleton</b> | <b>Spinophilin</b> | PPP1R9B | Protein Phosphatase 1<br>Regulatory subunit 9B<br>/ Spn / SPINO /<br>PPP1R6 / Neurabin-2 | -Ubiquitous, cell body,<br>dendrites, axon, dendritic<br>spines<br>-Scaffold between membranes<br>and cytoskeleton<br>-Spine morphology, synaptic<br>plasticity, neuronal migration<br>-Decreased mRNA in MAP6 KO<br>mice (11)<br>-Psychiatric disorders | Tubulin/Actin<br>Neurofilament<br>Dynamin 1<br>CamKII<br>14-3-3 $\zeta/\delta$<br>$\alpha$ -Adaptin<br>Endophilin 1<br>SNAP25<br>Agap2<br>Calmodulin<br>MAP6D1 | -Co-IP                    | (12) | Moderate |
|                     | <b>Tctex1</b>      | DYNLT1  | T-complex testis<br>expressed 1 /<br>Dynein light chain<br>Tctex-type 1                  | -Ubiquitous, cell body,<br>dendrites, axon<br>-Surface expression of Ca <sub>v</sub><br>-Ca <sup>2+</sup> influx<br>-Actin remodeling in neurite<br>-Primary cilium length                                                                               |                                                                                                                                                                | -Yeast 2 Hybrid<br>-Co-IP | (8)  | Strong   |
|                     | <b>MAP6d1</b>      | MAP6D1  | MAP6 domain<br>containing protein 1 /<br>SL21 / STOP-like<br>protein of 21 kDa           | -Strictly neuronal<br>-Golgi apparatus<br>-Cytoskeleton                                                                                                                                                                                                  |                                                                                                                                                                | -Yeast 2 Hybrid<br>-Co-IP | (13) | Strong   |
|                     | <b>MAP6</b>        | MAP6    | Microtubule-<br>Associated Protein 6 /<br>Stable Tubule Only<br>Polypeptide (STOP)       |                                                                                                                                                                                                                                                          |                                                                                                                                                                | -Yeast 2 Hybrid<br>-Co-IP | (13) | Strong   |
| <b>Endocytosis</b>  | <b>SNAP25</b>      | SNAP25  | Synaptosome-<br>associated protein 25<br>/ SEC9                                          | -Pre-synaptic compartment<br>-t-SNARE vesicle fusion<br>-Calcium regulated                                                                                                                                                                               | Tubulin                                                                                                                                                        | -Co-IP                    | (14) | High     |

|                    |                                                 |                                    |                                                                                                  |                                                                                                                                                      |                  |                                             |         |          |
|--------------------|-------------------------------------------------|------------------------------------|--------------------------------------------------------------------------------------------------|------------------------------------------------------------------------------------------------------------------------------------------------------|------------------|---------------------------------------------|---------|----------|
| <b>Endocytosis</b> | <b>Intersectin 1</b>                            | ITSN1                              | Intersectin-1 / ITSN / SH3D1A / SH3P1                                                            | -Pre and post-synaptic compartments<br>-Adaptor protein for Clathrin-Mediated Endocytosis<br>-GEF for CDC42<br>-Actin remodeling (N-WASP activation) | Dynamin 1        | -GST pull-down<br>-Co-IP                    | (7, 15) | Strong   |
|                    | <b>Dynamin 1<br/>Endophilin 1<br/>α-Adaptin</b> | DNM1                               | Dynamin-1 / DNM / EIEE31                                                                         | -Pre and post-synaptic compartments<br>-Vesicle neck constriction<br>-Vesicle transport and targeting<br>-Actin remodeling                           | BK <sub>Ca</sub> | -GST pull-down with a mix of the 3 proteins | (16)    | Moderate |
|                    |                                                 | SH3GL2                             | Endophilin A1 / SH3 domain containing GRB2like 2 / CNSA2 / SH3P4 / EEN-B1 / SH3D2A               | -Pre and post-synaptic compartments<br>-Vesicle endocytosis<br>-Dendritic spine morphogenesis and plasticity                                         |                  |                                             |         |          |
|                    |                                                 | AP2A2                              | α-Adaptin C / Adaptor-related protein complex 2 subunit α-2 / ADTAB / CLAPA2                     | -Pre and post-synaptic compartments<br>-Vesicle recycling via Clathrin-Mediated Endocytosis                                                          |                  |                                             |         |          |
|                    | <b>TMEM106B</b>                                 | TMEM106B                           | Transmembrane protein 106B / HLD16                                                               | -Membrane of lysosomes<br>-Lysosomal function<br>-Frontotemporal lobar degeneration                                                                  |                  | -Co-IP                                      | (17)    | Strong   |
| <b>Varp</b>        | ANKRD27                                         | Ankyrin repeat domain 27 / PP12899 | -Ubiquitous, cell body, dendrites, axon<br>-Early endosomes<br>-GEF for Rab21<br>-Neurite growth |                                                                                                                                                      | -GST pull-down   | (18)                                        | High    |          |

|                                       |                                      |         |                                                                                                       |                                                                                                                                                                                                                                          |                                                                                       |                          |         |          |
|---------------------------------------|--------------------------------------|---------|-------------------------------------------------------------------------------------------------------|------------------------------------------------------------------------------------------------------------------------------------------------------------------------------------------------------------------------------------------|---------------------------------------------------------------------------------------|--------------------------|---------|----------|
| <b>Endocytosis</b>                    | <b>Bri2</b>                          | ITM2B   | Integral membrane protein 2B / BRI / FBD / ABRI / E25B / E3-16 / RDGCA / BRICD2B                      | -Ubiquitous, cell body, dendrites, axon<br>-Transmembrane protein in ER, Golgi apparatus, plasma membrane and vesicles<br>-Regulation of A $\beta$ oligomerization levels<br>-Neuron maturation<br>-Familial British and Danish dementia | Agap2<br>Neurofilament<br>SNAP25<br>Dynamin 1<br>CaMKII<br>Endophilin 1<br>Tubulin    | -Co-IP                   | (19)    | Moderate |
|                                       | <b><math>\alpha</math>-Synuclein</b> | SNCA    | $\alpha$ -Synuclein / PD1 / NACP / PARK1 / PARK4                                                      | -Pre-synaptic compartment<br>-Synaptic vesicles release<br>-SNARE protein folding                                                                                                                                                        | Neurofilament<br>CAMKII<br>Actin<br>Tubulin<br>14-3-3 $\zeta/\delta$                  | -Peptide-affinity column | (20)    | Moderate |
| <b>Neuro-receptors &amp; channels</b> | <b>Ca<sub>v</sub>2.1</b>             | CACNA1A | Calcium voltage-gated channel subunit $\alpha$ -1 A / CACNL1A4 / EA2 / FHM / MHP / APCA / HPCA / SCA6 | -Pre-synaptic compartment<br>-Fast synaptic transmission<br>-Familial Hemiplegic migraine and Episodic ataxia 2<br>-Spinocerebellar ataxia 6                                                                                             | CAMKII<br>Intersectin 1<br>BK <sub>Ca</sub><br>SNAP25<br>Tubulin                      | -Co-IP                   | (21)    | Moderate |
|                                       | <b>Ca<sub>v</sub>2.2</b>             | CACNA1B | Calcium voltage-gated channel subunit $\alpha$ -1 B / CACNN / DYT23 / NEDNEH / CACNL1A5               | -Pre-synaptic compartment<br>-Neurotransmitter release<br>-Fast synaptic transmission                                                                                                                                                    | CAMKII<br>14-3-3 $\epsilon$<br>Intersectin 1<br>BK <sub>Ca</sub><br>SNAP25<br>Tubulin | -Co-IP                   | (8, 21) | Strong   |
|                                       | <b>Ca<sub>v</sub>2.3</b>             | CACNA1E | Calcium voltage-gated channel subunit $\alpha$ -1 E                                                   | -Pre-synaptic compartment<br>-Modulation of neuronal firing                                                                                                                                                                              | SNAP25<br>Tubulin                                                                     | -Co-IP                   | (21)    | Moderate |
|                                       | <b>Ca<sub>v</sub>Beta3</b>           | CACNB3  | Voltage-dependent L-type calcium channel subunit beta-3 / CAB3 / CACNLB3                              | -Pre- and post-synaptic compartments<br>-L-type calcium channel subunit                                                                                                                                                                  | CAMKII<br>Ca <sub>v</sub> 2.1<br>Ca <sub>v</sub> 2.2<br>Ca <sub>v</sub> 2.3<br>SNAP25 |                          |         |          |

|                                       |                            |        |                                                                                                             |                                                                                                                                                                       |                                                                                       |                |      |          |
|---------------------------------------|----------------------------|--------|-------------------------------------------------------------------------------------------------------------|-----------------------------------------------------------------------------------------------------------------------------------------------------------------------|---------------------------------------------------------------------------------------|----------------|------|----------|
| <b>Neuro-receptors &amp; channels</b> | <b>Ca<sub>v</sub>Beta4</b> | CACNB4 | Calcium voltage-gated channel auxiliary subunit beta 4 / EA5 / EJM / CAB4 / EIG9 / EJM4 / EJM6 / CACNLB4    | -Pre- and post-synaptic compartments<br>-Possible component of P-/Q-type calcium channel                                                                              | CAMKII<br>Ca <sub>v</sub> 2.1<br>Ca <sub>v</sub> 2.2<br>Ca <sub>v</sub> 2.3<br>SNAP25 |                |      |          |
|                                       | <b>BK<sub>Ca</sub></b>     | KCNA1  | Potassium voltage-gated channel subfamily A member 1 / EA1 / MK1 / AEMK / HBK1 / HUK1 / MBK1 / RBK1 / KV1.1 | -Brain, plasma membrane<br>-Tetrameric voltage-gated delayed potassium channel<br>-Myokymia with periodic ataxia                                                      | Tubulin                                                                               | -GST pull-down | (22) | Moderate |
|                                       | <b>Plexin D1</b>           | PLXND1 | Plexin-D1 / PLEXD1                                                                                          | -Cortical, subicular and striatal neurons<br>-Guidance receptor of Sema3E                                                                                             |                                                                                       | -Co-IP         | (7)  | Moderate |
|                                       | <b>Neuropilin 1</b>        | NRP1   | Neuropilin 1 / NP1 / NRP / BDCA4 / CD304 / VEGF165R                                                         | -Neurons<br>-Receptor of several class 3 semaphorin<br>-Sema3E attractive pathway<br>-Co-receptor of PlexinD1                                                         |                                                                                       |                |      |          |
|                                       | <b>VEGFR2</b>              | KDR    | Kinase insert domain receptor / FLK1 / CD309 / VEGFR                                                        | -Neurons and astrocytes<br>-Receptor tyrosine kinase<br>-Neurogenesis, neuronal survival, synaptic plasticity<br>-Sema3E attractive pathway, co-receptor of plexin D1 |                                                                                       |                |      |          |

|                            |                   |          |                                                                                       |                                                                                                                       |                                                                |                                                                                    |             |          |
|----------------------------|-------------------|----------|---------------------------------------------------------------------------------------|-----------------------------------------------------------------------------------------------------------------------|----------------------------------------------------------------|------------------------------------------------------------------------------------|-------------|----------|
| <b>Signal transduction</b> | <b>zDHHC13</b>    | ZDHHC13  | Zinc finger DHHC-type palmitoyltransferase 13                                         | -Wide cellular expression<br>-Golgi apparatus and vesicles<br>-Palmitoyltransferase                                   | SNAP25                                                         | -Yeast 2 Hybrid                                                                    | (23)        | Moderate |
|                            | <b>zDHHC17</b>    | ZDHHC17  | Zinc finger DHHC-type palmitoyltransferase 17 / HIP14                                 | -Golgi apparatus and vesicles<br>-Palmitoyltransferase specific of a subset of neuronal proteins (SNAP25, HTT, PSD95) |                                                                | -Yeast 2 Hybrid<br>-His pull-down                                                  |             | Strong   |
|                            | <b>ABHD17A</b>    | ABHD17 A | Depalmitoylase $\alpha/\beta$ hydrolase domain-containing protein 17A / FAM108A1      | -Plasma membrane, Golgi, vesicles<br>-Depalmitoylase                                                                  |                                                                | -Over-expression (induces delocalization of MAP6 from vesicles)                    | (24)        | Moderate |
|                            | <b>ABHD17B</b>    | ABHD17 B | Depalmitoylase $\alpha/\beta$ hydrolase domain-containing protein 17B / FAM108B1      | -Plasma membrane, Golgi, vesicles<br>-Depalmitoylase                                                                  |                                                                |                                                                                    |             |          |
|                            | <b>ABHD17C</b>    | ABHD17 C | Depalmitoylase $\alpha/\beta$ hydrolase domain-containing protein 17C / FAM108C1      | -Plasma membrane, Golgi, vesicles<br>-Depalmitoylase                                                                  |                                                                |                                                                                    |             |          |
|                            | <b>APT1</b>       | LYPLA1   | Acyl-protein-thioesterase 1 / APT-1 / hAPT1 / Lysophospholipase A1 / LPL-1 / LysoPLA1 | -Wide expression, cytosolic<br>-Depalmitoylase<br>-Dendritic spine morphogenesis<br>-Notch and Wnt signaling          |                                                                | -Multiplexed mass spectrometry<br>-Palmitoylation assay                            | (25, 26)    | High     |
|                            | <b>Calmodulin</b> | CALM1    | CaM / CAM2 / CAM3 / CAMB / CAMC / CAMI / PHKD / CPVT4 / DD132 / CALML2 / CAMIII       | -Ubiquitous<br>-Ca <sup>2+</sup> signaling<br>-Synaptic transmission and plasticity                                   | Actin<br>14-3-3<br>CaMKII<br>Endophilin 1<br>Tubulin<br>CAMKII | -Affinity-column<br>-Peptide spots<br>-Sepharose-affinity column<br>-GST pull down | (1, 27, 28) | Strong   |

|                            |                                         |                |                                                                                                                              |                                                                                                                                                                           |                                                                          |                                       |      |          |
|----------------------------|-----------------------------------------|----------------|------------------------------------------------------------------------------------------------------------------------------|---------------------------------------------------------------------------------------------------------------------------------------------------------------------------|--------------------------------------------------------------------------|---------------------------------------|------|----------|
| <b>Signal transduction</b> | <b>Rac1</b>                             | RAC1           | Rac family small GTPase 1 / MIG5 / MRD48 / TC-25 / p21-Rac1                                                                  | -Plasma membrane-bound small GTPase<br>-Cytoskeletal rearrangement<br>-Axon growth and guidance                                                                           |                                                                          | -Avi-tag Pull-down                    | (29) | Moderate |
|                            | <b>Rac2</b>                             | RAC2           | Rac family small GTPase 2 / Gx / EN-7 / IMD73A / IMD73B / IMD73C / HSPC022 / p21-Rac2                                        | -Plasma membrane-bound small GTPase<br>-Cytoskeletal rearrangement                                                                                                        |                                                                          |                                       |      |          |
|                            | <b>14-3-3 <math>\zeta/\delta</math></b> | YWHAZ          | Tyrosine 3-monooxygenase / tryptophan 5-monooxygenase activation protein zeta / HEL4 / KCIP-1 / HEL-S-3 / HEL-S-93 / POPCHAS | -Ubiquitous, cytosolic<br>-Binding to phosphoserine-containing proteins<br>-Cell signaling<br>-Neurogenesis<br>-Neurodevelopmental defects<br>-Neuropsychiatric disorders | Actin<br>CaMKII<br>Calmodulin<br>Neurofilament<br>Spinophilin<br>Tubulin | -Tandem affinity purification         | (30) | Moderate |
|                            | <b>CAMKII</b>                           | Multiple genes | Calcium/calmodulin-dependent protein kinase II                                                                               | -Post-synaptic compartment<br>-Serine/threonine kinase<br>-Dendritic spine and synapse formation<br>-Synaptic plasticity<br>-Autosomal Dominant Mental Retardation        |                                                                          | -CaMKII-phospho sites (S198 and S491) | (5)  | Strong   |
|                            | <b>Agap2</b>                            | AGAP2          | ArfGAP with GTPase domain / ankyrin repeat and PH domain 2                                                                   | -Cytosolic, nuclear<br>-GTPase<br>-Anti-apoptotic (NGF, phosphoinositide 3-kinase)                                                                                        | PI3K                                                                     | -Co-IP                                | (31) | Moderate |
|                            | <b>Src</b>                              | SRC            | SRC proto-oncogene, non-receptor tyrosine kinase / ASV / SRC1 / THC6 / c-SRC / p60-Sr                                        | -Cell body, dendrites, axon<br>-Non-receptor tyrosine kinase<br>-NMDA receptor activation                                                                                 |                                                                          | -GST pull-down                        | (7)  | Moderate |

|                                          |                     |        |                                                                                        |                                                                                                                               |                                                                  |                         |      |          |
|------------------------------------------|---------------------|--------|----------------------------------------------------------------------------------------|-------------------------------------------------------------------------------------------------------------------------------|------------------------------------------------------------------|-------------------------|------|----------|
| <b>Signal transduction</b>               | <b>p85/PI3K</b>     | PIK3R1 | Phosphoinositide-3-kinase regulatory subunit 1 / p85 / AGM7 / GRB1 / IMD36 / p85-ALPHA | -Ubiquitous, cytosolic<br>-Subunit of PI3K<br>-AKT/mTOR signaling pathway                                                     |                                                                  | -GST pull-down          | (7)  | Moderate |
|                                          | <b>TNK2</b>         | TNK2   | Tyrosine kinase non-receptor 2 / ACK / ACK1 / p21cdc42Hs                               | -Cytosolic<br>-Non-receptor tyrosine kinase<br>-EGF signaling pathway<br>-Severe autosomal recessive infantile-onset epilepsy | Actin<br>Neurofilament<br>CaMKII<br>Tubulin<br>$\alpha$ -Adaptin | -Immuno-affinity column | (32) | High     |
|                                          | <b>Presenilin 1</b> | PSEN1  | Presenilin-1 / AD3 / FAD / PS1 / S182 / ACNINV3                                        | -Plasma membrane, endosomes<br>-Catalytic subunit of the $\gamma$ -secretase complex<br>-Alzheimer Disease                    | Actin<br>CaMKII<br>Tubulin                                       | -GST pull down          | (33) | Moderate |
| <b>Nuclear receptors &amp; effectors</b> | <b>Coup-TF1</b>     | NR2F1  | Nuclear Receptor subfamily 2 group F member 1 / EAR-3 / SVP44 / BBSOAS / ERBAL3        | -Nuclear, transcription factor<br>-Neuronal differentiation and development<br>-Bosch-Boonstra optic atrophy syndrome         |                                                                  | -Yeast 2 Hybrid         | (34) | High     |
|                                          | <b>RAR-beta</b>     | RARB   | Retinoic Acid Receptor beta / HAP / RRB2 / NR1B2 / MCOPS12                             | -Nuclear<br>-Neuronal differentiation<br>-Intellectual disability<br>-Motor impairment                                        |                                                                  |                         |      | High     |
|                                          | <b>RAR-gamma</b>    | RARG   | Retinoic Acid Receptor Gamma / RARC / NR1B3                                            | -Nuclear<br>-Neuronal differentiation                                                                                         |                                                                  |                         |      | High     |
|                                          | <b>RORB</b>         | RORB   | Retinoic Orphan Acid Receptor $\beta$ / EIG15 / NR1F2 / RZR-BETA / bA133M9.1           | -Nuclear<br>-Neurogenesis, axon growth<br>-Genetic Generalized Epilepsy                                                       |                                                                  |                         |      | Moderate |



|  |               |        |                                                                                                    |                                                                                                                          |                                           |                                        |      |          |
|--|---------------|--------|----------------------------------------------------------------------------------------------------|--------------------------------------------------------------------------------------------------------------------------|-------------------------------------------|----------------------------------------|------|----------|
|  | <b>SLX4IP</b> | SLX4IP | SLX4 interacting protein / C20orf94 / bA204H22.1 / bA254M13.1 / dJ1099D15.3                        | -Nuclear<br>-DNA maintenance and repair                                                                                  | 14-3-3 $\zeta/\delta$<br>Actin<br>Tubulin | -Tandem affinity purification          | (35) | Moderate |
|  | <b>TIA1</b>   | TIA1   | T cell intracellular antigen / TIA1 cytotoxic granule associated RNA-binding protein / WDM / ALS26 | -Nuclear, cytoplasmic stress granules<br>-Prion-related RNA-binding protein<br>-mRNA splicing<br>-Welder distal myopathy | $\alpha$ -Adaptin<br>SNAP25               | -Immuno-affinity column                | (36) | Moderate |
|  | <b>HERC2</b>  | HERC2  | HECT and RLD domain containing E3 ubiquitin protein ligase 2 / D15F37S1 / jdf2 / SHEP1 / p528      | -Nuclear, cytoplasmic<br>-E3 ubiquitin ligase<br>-Mental retardation, autosomal recessive 38 (MRT38)                     |                                           | -Co-IP<br>-Proteomic<br>-Bioinformatic | (37) | Moderate |

### Supplementary Table 1: MAP6 partners.

We classified MAP6 partners along the following categories: **Cytoskeleton, Endocytosis, Neuro-receptors & channels, Signal transduction, Nuclear receptors & effectors**. For each partner, the following information is given: Name of the human gene, Aliases, Localizations and roles, Other MAP6 partners found in the same experiment that highlights the partner, Identification method, References of the published work showing the interaction, Confidence of the interaction (Moderate when a single technique was used and with numerous partners found in the study; High when a single technique was used and with only a few partners found in the study; Strong when multiple techniques were used or when multiple independent works exist).

**Abbreviations:** IF (immunofluorescence assay), NMR (nuclear magnetic resonance), Co-IP (co-immunoprecipitation assay), GST (Glutathione S-transferase).

1. C. Bosc *et al.*, Identification of novel bifunctional calmodulin-binding and microtubule-stabilizing motifs in STOP proteins. *J Biol Chem* **276**, 30904-30913 (2001).
2. C. Delphin *et al.*, MAP6-F is a temperature sensor that directly binds to and protects microtubules from cold-induced depolymerization. *J Biol Chem* **287**, 35127-35138 (2012).
3. J. Lefevre *et al.*, Structural basis for the association of MAP6 protein with microtubules and its regulation by calmodulin. *J Biol Chem* **288**, 24910-24922 (2013).
4. L. Peris *et al.*, A key function for microtubule-associated-protein 6 in activity-dependent stabilisation of actin filaments in dendritic spines. *Nature communications* **9**, 3775 (2018).
5. J. Baratier *et al.*, Phosphorylation of microtubule-associated protein STOP by calmodulin kinase II. *J Biol Chem* **281**, 19561-19569 (2006).
6. F. Letournel, A. Bocquet, F. Dubas, A. Barthelaix, J. Eyer, Stable tubule only polypeptides (STOP) proteins co-aggregate with spheroid neurofilaments in amyotrophic lateral sclerosis. *Journal of neuropathology and experimental neurology* **62**, 1211-1219 (2003).
7. J. C. Deloulme *et al.*, Microtubule-associated protein 6 mediates neuronal connectivity through Semaphorin 3E-dependent signalling for axonal growth. *Nature communications* **6**, 7246 (2015).
8. J. Brocard *et al.*, MAP6 interacts with Tctex1 and Cav 2.2/N-type calcium channels to regulate calcium signalling in neurons. *Eur J Neurosci* **46**, 2754-2767 (2017).
9. L. Sang *et al.*, Mapping the NPHP-JBTS-MKS protein network reveals ciliopathy disease genes and pathways. *Cell* **145**, 513-528 (2011).
10. J. Arama *et al.*, Bmcc1s, a novel brain-isoform of Bmcc1, affects cell morphology by regulating MAP6/STOP functions. *PloS one* **7**, e35488 (2012).
11. S. L. Eastwood *et al.*, Altered expression of synaptic protein mRNAs in STOP (MAP6) mutant mice. *J Psychopharmacol* **21**, 635-644 (2007).
12. D. S. Watkins, J. D. True, A. L. Mosley, A. J. Baucum, Correction: Baucum II, Anthony J. et al. Proteomic Analysis of the Spinophilin Interactome in Rodent Striatum Following Psychostimulant Sensitization. *Proteomes* 2018, 6, 53. *Proteomes* **7** (2019).
13. S. Gory-Faure *et al.*, Non-microtubular localizations of microtubule-associated protein 6 (MAP6). *PloS one* **9**, e114905 (2014).
14. G. Gorini *et al.*, Dynamin-1 co-associates with native mouse brain BKCa channels: proteomics analysis of synaptic protein complexes. *FEBS Lett* **584**, 845-851 (2010).
15. D. Morderer *et al.*, Endocytic adaptor protein intersectin 1 forms a complex with microtubule stabilizer STOP in neurons. *Gene* **505**, 360-364 (2012).
16. G. E. Craft, M. E. Graham, N. Bache, M. R. Larsen, P. J. Robinson, The in vivo phosphorylation sites in multiple isoforms of amphiphysin I from rat brain nerve terminals. *Molecular & cellular proteomics : MCP* **7**, 1146-1161 (2008).
17. B. M. Schwenk *et al.*, The FTL risk factor TMEM106B and MAP6 control dendritic trafficking of lysosomes. *EMBO J* **33**, 450-467 (2014).
18. P. N. Vikhрева, E. V. Korobko, I. V. Korobko, Identification of novel proteins, possible interaction partners for guanine nucleotide exchange factor Varp. *Dokl Biochem Biophys* **429**, 323-325 (2009).
19. F. Martins *et al.*, Identification and characterization of the BRI2 interactome in the brain. *Scientific reports* **8**, 3548 (2018).
20. M. A. McFarland, C. E. Ellis, S. P. Markey, R. L. Nussbaum, Proteomics analysis identifies phosphorylation-dependent alpha-synuclein protein interactions. *Molecular & cellular proteomics : MCP* **7**, 2123-2137 (2008).
21. C. S. Muller *et al.*, Quantitative proteomics of the Cav2 channel nano-environments in the mammalian brain. *Proc Natl Acad Sci U S A* **107**, 14950-14957 (2010).
22. H. Kim, S. Jo, H. J. Song, Z. Y. Park, C. S. Park, Myelin basic protein as a binding partner and calmodulin adaptor for the BKCa channel. *Proteomics* **7**, 2591-2602 (2007).
23. K. Lemonidis, M. C. Sanchez-Perez, L. H. Chamberlain, Identification of a novel sequence motif recognised by the ankyrin-repeat domain of zDHHC17/13 S-acyl-transferases. *J Biol Chem* 10.1074/jbc.M115.657668 (2015).
24. E. Tortosa *et al.*, Dynamic Palmitoylation Targets MAP6 to the Axon to Promote Microtubule Stabilization during Neuronal Polarization. *Neuron* **94**, 809-825 e807 (2017).
25. S. J. Won, B. R. Martin, Temporal Profiling Establishes a Dynamic S-Palmitoylation Cycle. *ACS chemical biology* **13**, 1560-1568 (2018).
26. G. P. H. Ho *et al.*, Upregulation of Cellular Palmitoylation Mitigates alpha-Synuclein Accumulation and Neurotoxicity. *Mov Disord* 10.1002/mds.28346 (2020).

27. T. Berggard *et al.*, 140 mouse brain proteins identified by Ca<sup>2+</sup>-calmodulin affinity chromatography and tandem mass spectrometry. *Journal of proteome research* **5**, 669-687 (2006).
28. S. Yurimoto *et al.*, Identification and characterization of wolframin, the product of the wolfram syndrome gene (WFS1), as a novel calmodulin-binding protein. *Biochemistry* **48**, 3946-3955 (2009).
29. M. E. Capala *et al.*, Mitochondrial Dysfunction in Human Leukemic Stem/Progenitor Cells upon Loss of RAC2. *PLoS one* **10**, e0128585 (2015).
30. P. O. Angrand *et al.*, Transgenic mouse proteomics identifies new 14-3-3-associated proteins involved in cytoskeletal rearrangements and cell signaling. *Molecular & cellular proteomics : MCP* **5**, 2211-2227 (2006).
31. B. Wilkinson, J. Li, M. P. Coba, Synaptic GAP and GEF Complexes Cluster Proteins Essential for GTP Signaling. *Scientific reports* **7**, 5272 (2017).
32. M. Del Mar Masdeu *et al.*, Identification of novel Ack1-interacting proteins and Ack1 phosphorylated sites in mouse brain by mass spectrometry. *Oncotarget* **8**, 101146-101157 (2017).
33. K. M. Zoltowska, M. Maesako, O. Berezovska, Interrelationship between Changes in the Amyloid beta 42/40 Ratio and Presenilin 1 Conformation. *Molecular medicine (Cambridge, Mass)* **22**, 329-337 (2016).
34. M. Albers *et al.*, Automated yeast two-hybrid screening for nuclear receptor-interacting proteins. *Molecular & cellular proteomics : MCP* **4**, 205-213 (2005).
35. H. Zhang *et al.*, SLX4IP acts with SLX4 and XPF-ERCC1 to promote interstrand crosslink repair. *Nucleic Acids Res* **47**, 10181-10201 (2019).
36. T. Vanderweyde *et al.*, Interaction of tau with the RNA-Binding Protein TIA1 Regulates tau Pathophysiology and Toxicity. *Cell reports* **15**, 1455-1466 (2016).
37. J. Li *et al.*, Spatiotemporal profile of postsynaptic interactomes integrates components of complex brain disorders. *Nat Neurosci* **20**, 1150-1161 (2017).
